# Supplementary material for: Properties of SS304 Modified by Nickel–Cobalt Alloy Coating with Cauliflower-Shaped Micro/Nano Structures in Simulated PEMFC Cathode Environment
Source: MDPI journal article supplement (doi:10.3390/nano12121976), 2022-06-09
Supplement: s1 [file s1]

# **Supplementary materials**

## **Properties of SS304 modified by nickel-cobalt alloy coating with cauliflower-shaped micro/nano structures in simulated PEMFC cathode environment**

Junji Xuan <sup>1,2</sup>, Yueren Liu <sup>2</sup>, Likun Xu <sup>1,2,\*</sup>, Yonglei Xin <sup>2</sup>, Lili Xue <sup>1</sup>, Li Li <sup>1</sup>

<sup>1</sup> College of Materials Science and Chemical Engineering, Harbin Engineering University, Harbin 150001, P. R. China

<sup>2</sup> State Key Laboratory for Marine Corrosion and Protection, Luoyang Ship Material Research Institute, Qingdao 266237, P. R. China

\* Correspondence: xulk@sunrui.net (L.X.)

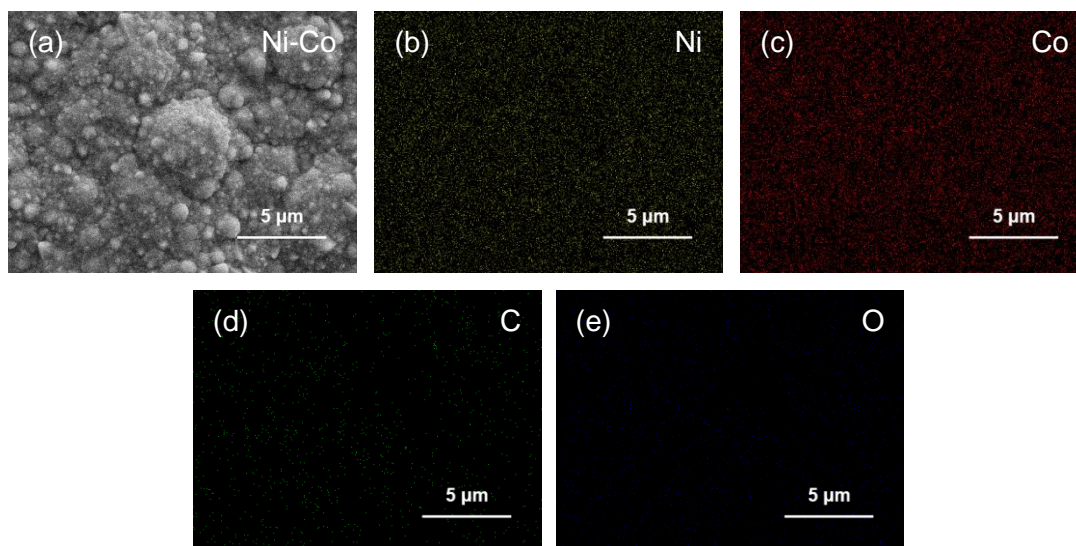

**Figure S1.** EDS mapping of the surface elements of the cauliflower-shaped structure on the electrodeposited Ni-Co coating. (a) Ni-Co; (b) Ni; (c) Co; (d) C; (e) O.
